# Supplementary material
Source: publisher site journal article supplement (https://www.dovepress.com/article/454877)
Supplement: Supplementary file 1 [file get_supplementary_file.php]

**Supplementary Appendix**

***Supplementary methods***

**Physician survey**

All potential physicians were first asked a series of screening questions to ensure that they fulfilled the necessary criteria to be included in this study. Screening questions asked if the participant was a physician, if they were able to prescribe medication, what their specialty was, if they had treated at least 12 patients with uncontrolled or exacerbating chronic obstructive pulmonary disease (COPD) in the past year, and how many patients with COPD they treated per week. Physician’s specialty was self-determined. If the physician answered “no” to any of these questions, then their survey was terminated, and they were excluded from the study. Physicians were also asked the year in which they completed their residency. As per the study inclusion and exclusion criteria, if this year was before 1996 or after 2016, they were also excluded from the study.

All eligible physicians were then presented with the same five fictitious vignettes, describing the clinical profiles of four different patients. Each vignette was followed by six questions, which were specific to the treatment of the patients described, including treatment choices and factors that the physicians considered in their decision. Firstly, physicians were asked if they would change the patient’s current plan. If they would make a change to the patient’s treatment, the physician was asked what further (if any) clinical assessments they would request to assess the need for the treatment change, and what change to the treatment plan they would make to resolve the patient’s symptoms. These options included: admit the patient to hospital, order outpatient nebulizations, prescribe oral steroid/antibiotic, prescribe a new rescue inhaler, increase current maintenance inhaler dose, add a new maintenance inhaler, order home oxygen, or any other change. Physicians were then asked to rank a list of factors that they may consider when making treatment decisions, as well as factors they may consider when choosing to modify the patient’s current treatment plan, from least important to most important. The average rank of importance for these factors was presented in each vignette, as well as the proportion of time each factor was ranked in physicians’ top three choices. Lastly, the physicians were asked to rank the top three most important details they considered when making treatment decisions. Once the physicians had completed the survey, no changes to answers were accepted.

Following the patient vignettes, the physicians then completed survey items regarding general questions about COPD treatment practices. Firstly, physicians were asked how often they considered treatment guidelines when making their treatment decisions. Physicians were then presented with a list of treatment options: spirometry, pulmonary rehabilitation, rescue inhalers, single-agent maintenance inhalers, combination non-inhaled corticosteroid (ICS) inhalers, and combination ICS/long‑acting muscarinic antagonist or ICS/long-acting β2‑agonist inhalers, and were asked to select any perceived patient barriers they considered in their treatment decisions. Following this, physicians were presented with a list of comorbidities and were asked to select the ones that affected their treatment decisions. Physicians were then asked to select the reasons that they might switch the patient’s maintenance inhaler, as well as reasons for non-adherence that they commonly see in routine practice. The next question featured a list of circumstances and required the physician to respond how likely they were to change a patient’s COPD maintenance inhaler based on each individual circumstance. Physicians were asked how often they administer the modified Medical Research Council or COPD Assessment Test, and if the patient’s score impacts their treatment decisions.

For the final section of the survey, physicians were asked about their practice setting, location, gender, years of clinical experience, and the approximate number of patients with COPD seen per week. Practice setting was defined as the place where the physician saw most of their patients (if they worked across more than one setting).

**Multivariable analyses**

Repeated measures multivariable models examined triple therapy maintenance inhaler prescription patterns. The final model included a total of 14 predictors:

- Decision-making factors
  - Guidelines such as GOLD (yes/no)
  - Cost of alternative treatments (yes/no)
  - History of new symptoms (yes/no)
  - Patient insurance status (yes/no)
  - Clinical guidelines (yes/no)
- Practice-related factors
  - Number of patients with COPD managed per week (1–5; 6–10; 11–15; at least 16)
  - Setting where you see patients (primary care; inpatient setting; urgent care; telemedicine)
  - See patients for COPD symptoms via telemedicine (yes/no)
  - Practice setting (urban; suburban; rural)
  - Medical records system provides prompts to assist in diagnosing/treating patients with COPD (yes/no)
  - Geographic location (Northeast; Midwest; South; West)
- Provider-level factors
  - Respondent’s specialty (primary care; internal medicine; pulmonology)
  - Years spent managing patients with COPD (<10; 10–14; 15–19; 20–24; 25+)
  - Gender (female; male; prefer not to say)

**Table S1** Patient vignettes

| **Vignette** | **Description** |
| --- | --- |
| Vignette 1 | Male, age 67, current smoker, COPD diagnosed 10 years ago, hypertension. At annual visit, describes SOB with moderate activity. Inconsistent fluticasone/vilanterol (ICS/LABA) use, albuterol sulfate (SABA) use more often than usual. |
| Vignette 2 | Female, age 60, never smoked, history of asthma, COPD diagnosis 5 years ago. Day 3 of a cold with SOB and low-grade fever. Pulse 83, BP 129/78. Sputum culture shows bacterial infection. Nebulized with PFT administered. FEV1/FVC 60%. Uses tiotropium bromide (LAMA) as prescribed, ipratropium bromide (SAMA) when needed. |
| Vignette 3 | Male, age 51, COPD diagnosis <6 months ago. Day 14 of dyspnea, fatigue, productive cough. Not improving. Nighttime awakening. FEV1/FVC <70%, FEV1% 55% predicted. Uses vilanterol/umeclidinium (LABA/LAMA) and albuterol (SABA) as prescribed. |
| Vignette 4a | Female, age 73, former smoker, COPD diagnosis "a while ago". Arrived by ED/ambulance. Tachycardia, dyspnea with cyanosis, mental confusion. Prescribed oral steroids for previous exacerbation within the last year. On albuterol (SABA), fluticasone/vilanterol (ICS/LABA), naproxen (NSAID), and atorvastatin (statin). |
| Vignette 4b | Female, age 73, former smoker, COPD diagnosis "a while ago”. Follow-up visit after discharge for ED visit described in 4a. No change to medication was made during that encounter. As noted above, is on albuterol (SABA), fluticasone/vilanterol (ICS/LABA), naproxen (NSAID), and atorvastatin (statin). |

**Abbreviations:** BP, blood pressure; COPD, chronic obstructive pulmonary disease; ED, emergency department; FEV1, forced expiratory volume in one second; FVC, forced vital capacity; ICS, inhaled corticosteroid; LABA, long-acting β2-agonist; LAMA, long-acting muscarinic antagonist; NSAID, non-steroidal anti-inflammatory drug; PFT, pulmonary function test; SABA, short-acting β2-agonist; SAMA, short-acting muscarinic antagonist;SOB, shortness of breath.

**Table S2** Physician characteristics

| **Physician characteristic** | **Overall**  **(N=200)** |
| --- | --- |
| **Mean (SD) years since residency completiona** | 20.4 (6.2) |
| **Specialty, n (%)** | |
| Primary care | 38 (19.0) |
| Internal medicine | 32 (16.0) |
| Pulmonology | 130 (65.0) |
| Other | 0 (0) |
| **Number of patients with COPD managed per week, n (%)** | |
| 1–5 | 14 (7.0) |
| 6–10 | 29 (14.5) |
| 11–15 | 39 (19.5) |
| At least 16 | 118 (59.0) |
| **Practice setting, n (%)** | |
| Primary/ambulatory care | 163 (81.5) |
| Inpatient | 30 (15.0) |
| Urgent care | 4 (2.0) |
| Emergency department | 0 (0) |
| Telemedicine | 3 (1.5) |
| **Specialty type, n (%)** | |
| Single specialty | 103 (51.5) |
| Multispecialty group | 97 (48.5) |
| **Do you see patients for COPD symptoms via telemedicine?, n (%)** | |
| Yes | 146 (73.0) |
| No | 54 (27.0) |
| **Does your practice utilize a medical records system that provides prompts to assist in diagnosing and/or treating patients with COPD?, n (%)** | |
| Yes | 94 (47.0) |
| No | 106 (53.0) |
| **Geographic location, n (%)** | |
| Northeast | 45 (22.5) |
| Midwest | 51 (25.5) |
| South | 66 (33.0) |
| West | 38 (19.0) |
| Other | 0 (0) |
| **Urbanicity, n (%)** | |
| Urban | 80 (40.0) |
| Suburban | 100 (50.0) |
| Rural | 20 (10.0) |
| **Mean (SD) years managing patients with COPD** | 20.5 (8.2) |
| **Current mean (SD) age, years** | 53.1 (9.5) |
| **Gender, n (%)** | |
| Female | 45 (22.5) |
| Male | 146 (73.0) |
| Nonbinary | 0 (0) |
| Another gender | 0 (0) |
| Prefer not to say | 9 (4.5) |

**Notes:** aCalculated as the year of the survey (2022), minus self-reported year of training completion (from 1996–2015).

**Abbreviations:** COPD, chronic obstructive pulmonary disease; SD, standard deviation.

**Table S3** Summary of multivariable models examining triple therapy maintenance inhaler prescription patterns

|  |  | **C-statistica** | | |
| --- | --- | --- | --- | --- |
|  | **Number of predictors** | **Switch to triple therapy maintenance inhaler  vs no change to maintenance inhaler (n=748)** | **Switch to triple therapy maintenance inhaler vs escalating current maintenance inhaler dose  (n=393)** | **Switch to triple therapy maintenance inhaler vs single- or dual-agent maintenance inhaler  (n=471)** |
| **Block 1** Vignette (categorical variable) | 1 | 0.7 | 0.6 | 0.7 |
| **Block 2** Self-reported decisions | 9 | 0.7 | 0.7 | 0.6 |
| **Block 3** Practice-level factors | 7 | 0.7 | 0.8 | 0.6 |
| **Block 4** Physician-level factors | 4 | 0.6 | 0.7 | 0.7 |
| **Blocks 1–4** | 21 | 0.8 | 0.8 | 0.8 |
| **Final modelb,c** Blocks 1–4 after backward selection | 14 | 0.8 | 0.8 | 0.8 |

**Notes:** aC-statistic (Harrell’s C, or concordance statistic, also known as area under the curve): the probability that the model’s predicted value for a randomly selected “case” is greater than the predicted value for a randomly selected “control”. Values range from 0.50 to 1.00. Values closer to 1.00 are desirable. bRemoved from this final model for collinearity with other predictors: years since residency completion. cIdentified variables that failed to contribute substantially to the preceding model (highest chi-square statistic for given predictor is <2). Patient age, smoking history, medication adherence as most important detail(s); cost of alternative treatments; single vs multispecialty group as practice setting; and physician’s current age in years.
